# Supplementary material for: Regenerating zebrafish fin epigenome is characterized by stable lineage-specific DNA methylation and dynamic chromatin accessibility
Source: PubMed Central journal article supplement (PMC7047409; doi:10.1186/s13059-020-1948-0), 2020-02-27
Supplement: 13059_2020_1948_MOESM2_ESM.pdf [file 13059_2020_1948_MOESM2_ESM.pdf]

**a**

| Sample      | Replicate | Total reads | Mapped reads | Uniquely mapped reads | Total usable deduplicated reads | Conversion rate | CpG coverage | CpG coverage when merged 2 replicates |
|-------------|-----------|-------------|--------------|-----------------------|---------------------------------|-----------------|--------------|---------------------------------------|
| 0 dpa       | rep1      | 97,658,873  | 79,705,299   | 61,725,695            | 52,904,004                      | 99.4%           | 5.4 ×        | 11.8 ×                                |
|             | rep2      | 116,021,637 | 94,788,726   | 73,313,528            | 60,642,787                      | 99.4%           | 6.4 ×        |                                       |
| 1 dpa       | rep1      | 92,058,825  | 76,114,617   | 58,906,303            | 51,640,789                      | 99.4%           | 5.3 ×        | 11.4 ×                                |
|             | rep2      | 113,204,853 | 91,046,108   | 70,075,098            | 58,299,260                      | 99.4%           | 6.1 ×        |                                       |
| 2 dpa       | rep1      | 99,980,528  | 82,032,356   | 63,422,729            | 54,284,784                      | 99.4%           | 5.6 ×        | 10.5 ×                                |
|             | rep2      | 89,146,117  | 71,400,051   | 54,668,950            | 45,628,590                      | 99.4%           | 4.9 ×        |                                       |
| 4 dpa       | rep1      | 101,604,298 | 83,685,983   | 64,884,467            | 55,677,089                      | 99.4%           | 5.8 ×        | 11.2 ×                                |
|             | rep2      | 101,359,139 | 81,288,749   | 62,543,423            | 50,097,492                      | 99.4%           | 5.4 ×        |                                       |
| sp7 - 0 dpa | rep1      | 339,204,355 | 263,254,635  | 208,856,633           | 107,842,698                     | 99.2%           | 16.2 ×       | 24.5 ×                                |
|             | rep2      | 183,079,036 | 144,419,774  | 111,456,372           | 79,061,213                      | 99.1%           | 8.3 ×        |                                       |
| sp7 - 4 dpa | rep1      | 321,079,453 | 248,605,943  | 193,871,449           | 90,207,873                      | 99.0%           | 13.7 ×       | 22.2 ×                                |
|             | rep2      | 186,176,940 | 147,505,796  | 114,235,979           | 80,567,036                      | 98.9%           | 8.5 ×        |                                       |
| sp7 + 0 dpa | rep1      | 310,404,583 | 239,316,840  | 186,915,989           | 97,084,337                      | 99.0%           | 14.6 ×       | 23.8 ×                                |
|             | rep2      | 193,099,532 | 153,731,695  | 119,345,224           | 86,914,170                      | 99.0%           | 9.2 ×        |                                       |
| sp7 + 4 dpa | rep1      | 425,545,301 | 327,149,583  | 258,216,194           | 142,611,326                     | 99.0%           | 19.7 ×       | 29.9 ×                                |
|             | rep2      | 216,557,384 | 172,815,147  | 134,644,393           | 98,949,557                      | 99.0%           | 10.3 ×       |                                       |

**b**

| Sample          | Replicate | Total reads | Mapped reads | Uniquely mapped reads |
|-----------------|-----------|-------------|--------------|-----------------------|
| sp7 - 0 dpa     | rep1      | 42,397,152  | 40,860,711   | 38,709,047            |
|                 | rep2      | 51,447,151  | 49,646,142   | 46,650,676            |
| sp7 - 4 dpa     | rep1      | 56,263,069  | 54,220,674   | 50,111,039            |
|                 | rep2      | 51,709,789  | 49,666,231   | 46,321,124            |
| sp7 + 0 dpa     | rep1      | 34,910,498  | 33,011,263   | 29,830,095            |
|                 | rep2      | 34,659,048  | 32,667,395   | 29,230,285            |
| sp7 + 4 dpa     | rep1      | 56,330,334  | 54,353,845   | 49,679,693            |
|                 | rep2      | 42,199,811  | 40,692,739   | 37,499,675            |
| fosl1a WT 0 dpa | rep1      | 27,336,562  | 21,922,819   | 20,945,083            |
|                 | rep2      | 28,693,638  | 25,782,283   | 25,020,842            |
| fosl1a WT 1 dpa | rep1      | 38,003,475  | 33,259,462   | 32,286,064            |
|                 | rep2      | 34,312,611  | 28,591,367   | 27,768,866            |
| fosl1a WT 4 dpa | rep1      | 25,979,519  | 22,304,260   | 21,459,157            |
|                 | rep2      | 29,289,437  | 25,747,832   | 24,772,616            |
| fosl1a KO 0 dpa | rep1      | 14,486,097  | 11,394,027   | 10,966,548            |
|                 | rep2      | 30,284,650  | 26,466,562   | 25,600,780            |
| fosl1a KO 1 dpa | rep1      | 21,277,366  | 16,666,701   | 16,084,880            |
|                 | rep2      | 24,836,141  | 21,148,430   | 20,335,083            |
| fosl1a KO 4 dpa | rep1      | 32,587,700  | 30,137,052   | 28,905,772            |
|                 | rep2      | 28,891,618  | 25,895,332   | 25,067,084            |

**c**

| Sample      | Replicate | Total reads | Mapped reads | Uniquely mapped reads | Deduplicated reads | Usable non-mtDNA deduplicated reads | NRF  | PBC1 |
|-------------|-----------|-------------|--------------|-----------------------|--------------------|-------------------------------------|------|------|
| sp7 - 0 dpa | rep1      | 48,777,880  | 46,752,872   | 30,360,005            | 20,256,036         | 18,992,120                          | 0.84 | 0.83 |
|             | rep2      | 52,228,548  | 50,206,758   | 30,530,025            | 25,436,495         | 24,599,307                          | 0.90 | 0.90 |
| sp7 - 4 dpa | rep1      | 65,295,695  | 62,852,594   | 41,481,708            | 35,512,644         | 34,610,284                          | 0.92 | 0.92 |
|             | rep2      | 49,949,977  | 48,153,800   | 32,503,895            | 26,801,632         | 25,828,844                          | 0.92 | 0.92 |
| sp7 + 0 dpa | rep1      | 54,540,740  | 52,520,180   | 36,832,014            | 29,025,584         | 28,125,390                          | 0.84 | 0.85 |
|             | rep2      | 45,460,131  | 43,822,103   | 30,220,217            | 24,286,404         | 23,372,268                          | 0.87 | 0.88 |
| sp7 + 4 dpa | rep1      | 54,873,697  | 52,880,959   | 33,498,301            | 27,758,854         | 26,892,808                          | 0.90 | 0.90 |
|             | rep2      | 62,733,310  | 59,781,317   | 37,735,807            | 31,516,024         | 30,613,833                          | 0.90 | 0.91 |

**Table S1** Overview of sequencing and mapping in this study. **a** Overview of WGBS sequencing and mapping. **b** Overview of RNA-seq sequencing and mapping. **c** Overview of ATAC-seq sequencing and mapping. NRF, non-redundant fraction; PBC, PCR bottlenecking coefficient. NRF is defined as number of PCR deduplicated reads divided by the total number of aligned reads. PBC1 is defined as number of genomic coordinates mapped with only one unique read divided by total number of genomic coordinates mapped with all reads.

**a**

| Primer name          | Primer sequence                                      | Usage                                               |
|----------------------|------------------------------------------------------|-----------------------------------------------------|
| ins-EF1a-F2          | GCACATTGGCTGCGAGCAGGGTGGATCATC                       | <i>EF1a:mCherry</i> fragment amplification          |
| ins_mCh_R2           | TCAGGAACAGGTGGccagtgtagtgatctcgag                    |                                                     |
| vec_mCh_F2           | GCGGCACGGAgTggagcagtagcagcg                          | GAB insulator fragment amplification from ZED       |
| PaclZEDdown_GAB_R    | CGCGGTACGCCATGGTTAATCGCAATTAACCCTCACTAAAGG           |                                                     |
| Ins_lepb2kb_F        | CTCGAGGTCGACGGTATTCTTGAACAAGTGACTTTTCGTTGCAAC        | <i>lepb</i> promoter amplification from genomic DNA |
| Ins_lepb2kb_R        | GACCGGTGGATCATTCTGCAAAGACCAAATGAAATTATATTTTTTC       |                                                     |
| Vector_lepb2kb_F     | CATTTGGTCTTTTGCAGAAATGATCCACCGGTCGCCACCATG           | EGFP fragment amplification from ZED                |
| Vec_GABIns-lepb2kb_R | CGGGGATCCGAGCTCGGTACCAGCTTTTGTTCCTTTAGTGAG           |                                                     |
| Vec_CmR-lepb2kb_F    | CTGGTAAACTCACCCAGGGATTGGCTGAGACGAAAACATATTCTCAATAAAC | <i>attR-CmR</i> fragment amplification from ZED     |
| Vector_lepb2kb_R     | ACGAAAGTCACTTGTTCAGAATACCGCTGCAGCTCGAGATAAC          |                                                     |

**b**

| Enhancer name         | Genomic coordinate (GRCz10) | Length | Forward PCR primer sequence  | Reverse PCR primer sequence   |
|-----------------------|-----------------------------|--------|------------------------------|-------------------------------|
| <i>bmp2a+43k</i>      | chr17:4030142-4030727       | 586    | CCAGTTAACCCACATGCTCA         | AATATTCGCCCTCCAGCCC           |
| <i>cdc42ep3+2k</i>    | chr13:42000312-42001230     | 919    | GCTGTAATTGCTGCCAGTAAGT       | CCACAGTGGCATCTCTTACC          |
| <i>chst3b+5kb</i>     | chr12:4898963-48990631      | 669    | GCATTTACTGGAGCTCTGCC         | AACCTCAACCTCCCTGTATG          |
| <i>col11a1a-6k</i>    | chr24:28819596-28820156     | 561    | TTGACCTGAAAGTGCAATGGT        | GTGTCTTTTCAGCAGGGCC           |
| <i>col11a2-7k</i>     | chr19:7312885-7313512       | 628    | ATGACAGACGTTCCACCT           | GCCGGTCTCCAAATCACTG           |
| <i>cygb1-13kb</i>     | chr3:6740622-6741421        | 800    | AAGCAACCAGAGTCAGACCA         | CACATGAGATGAAGCGCTGG          |
| <i>dnajc17-138kb</i>  | chr17:1110676-1111231       | 556    | TGACTGACCTCTACATACACCTG      | GTCTGTGATTGGACGAGCTC          |
| <i>fam102aa+11k</i>   | chr8:2608089-2608632        | 544    | TCGGTCTGCTGATTACAATAAACT     | ACACACCCGCACAGAACCT           |
| <i>fbnl1+17k</i>      | chr25:1624921-1625612       | 692    | TACAGATTATCAACACAAACCGA      | AGTCATCCAGAGTGTTTTATTGTGA     |
| <i>fhod3b+138k</i>    | chr16:19015751-19016085     | 335    | GACTGCACAACATCTGTGCC         | CAGGTTCTGTGTTTTCATCATGT       |
| <i>frmd4a+87k</i>     | chr18:8534404-8534871       | 468    | ATTAACACAGGTGAGAAAAGAGCA     | TCCCTGTGCTGTAAACATCA          |
| <i>grip2a-23k</i>     | chr8:7211666-7212152        | 487    | CACACACACTTTTGCAGGGA         | TGGCAACCCCTATCAGCTCT          |
| <i>igflr1-2k</i>      | chr15:37533052-37533452     | 401    | TCAACTTGTGTGGATTCAAGGA       | ACCTTGTCTGGCTTAATCTTGT        |
| <i>lef1-2k</i>        | chr1:49168747-49169031      | 285    | CTGTGTCTCTTTACCCGGA          | CGTAGCAGAAAACAAGAGGGG         |
| <i>mef2aa+2kb</i>     | chr18:23261921-23262551     | 631    | ACACAGCAAACACAGCAAGC         | ACCGTGAGTAGACAAGGGTG          |
| <i>mitd1-6k</i>       | chr9:7314150-7314957        | 808    | AAGCATACACAGTGGCTCT          | AACAATCCGCCACAAGACA           |
| <i>mntn1aa+31k</i>    | chr1:17612763-17613299      | 537    | GTGCAACCCATGATTGAAACA        | GGTGAACCCCTGCCCTAGACT         |
| <i>pdgfab-8k</i>      | chr3:12826209-12826797      | 589    | ACAGACGACAGACAGACAGA         | ATGCCCAAACCCCTGATACA          |
| <i>prdm1c+6k</i>      | chr20:48644764-48645028     | 265    | AGCATTCTGAGTCATTGAGGC        | ACAATTCGTGATGTGAAAACC         |
| <i>prdm5+120k</i>     | chr23:1908062-1908966       | 905    | TGTTATTCCTATCCTGCCACCA       | TTCAACATTTTCAGCTGGCCC         |
| <i>pk2aa+9k</i>       | chr19:1853609-1854509       | 901    | AGTTTCTTATCCCTCCCA           | GTGTGTGTGTGTGTGTGTGT          |
| <i>rasl11a-13k</i>    | chr7:51058598-51059197      | 600    | TTGACAACATACATGCAGCAAGA      | TTAATTGCACAGCTCTAGATTGC       |
| <i>rmb7-120kb</i>     | chr18:47186842-47187247     | 406    | GAGCACAAGGACAGCATAGC         | ACTATTGTGACATGCTGTCTGT        |
| <i>runx1-102k</i>     | chr1:1356289-1356844        | 556    | GCCTCTACACTATTCTGGC          | TCTGTGTGTGCAAGTGTGTG          |
| <i>swap70b+3k</i>     | chr18:16924893-16925515     | 623    | TTTGTGAAGTGGTCTGTGC          | GATTTACAATGCACCACAGC          |
| Negative controls     |                             |        |                              |                               |
| <i>atp5g3a-14k</i>    | chr9:2322648-2323311        | 664    | TGTGAGGGGACAGTGCTAAC         | GGTCAATTCGGATACAGCC           |
| <i>lmb1+11k (ZRS)</i> | chr7:40398267-40399390      | 1124   | ATCGCACACACAGATGTTG          | CACAAGCAGGCCATTTGACT          |
| <i>lnpa+56k</i>       | chr9:2075585-2076205        | 621    | CCGATCGCCACTATTAGCA          | TAAAAGCGGTGAATCGGGTG          |
| <i>six3b-36k</i>      | chr12:25473077-25474565     | 1489   | GGGGTACCCGCCATCTCTGAAAACATCA | ACCGCTCGAGGACAACAGGTCATGTGTGG |
| <i>six3b-39k</i>      | chr12:25470570-25471318     | 749    | GAGGCAGGGGGTAAGTTTTC         | CAAAACGTAACCAAGCAAA           |
| <i>six3b-102k</i>     | chr12:25406188-25406890     | 703    | TTCATTCGCTCATTCTTTCC         | CGATGATGACGACCAACT            |
| <i>six3b-104k</i>     | chr12:25404546-25405914     | 1369   | GGGGTACCCGCCACTGTGCTTCACTCAA | TGCAGCTCACCATCCACACGTTACAGC   |
| <i>wnt3-11k</i>       | chr12:22125867-22126566     | 700    | TATGCGGCTGTGGTATAAG          | ATGGCTCACGTTTCAATTC           |
| <i>zgc:173726-2kb</i> | chr22:2473460-2473891       | 432    | TAACITCAGGCCACCGTTTG         | TAGTGGTGGGCAAGCGAG            |

**c**

| Fra1 target genes     | Covered exons     | Length | Forward PCR primer sequence | Reverse PCR primer sequence |
|-----------------------|-------------------|--------|-----------------------------|-----------------------------|
| <i>runx1</i>          | exons 3 and 4     | 137    | GTGGCTCGTTTCAATGACCT        | GGTCCGTCCTGATGATCTT         |
| <i>fgf20a</i>         | exons 1, 2, and 3 | 148    | GAGGAAGGACCACAGCAGAT        | ACACTCGGCTGACAGCTTTT        |
| <i>ak5l</i>           | exons 1, 2, and 3 | 198    | GAGAGCATGTTAACAGGACTGATG    | ACCACCATCGAGTTTGCAG         |
| <i>dachc</i>          | exons 2 and 3     | 95     | GAATGTGACATCACCCGACA        | CAGCTGTTAGGCCAGTGTGA        |
| <i>tp1b</i>           | exons 4 and 5     | 153    | TACTGAGGTGCTTGGTTCC         | ATGGCAAGATCCGCAAAATA        |
| <i>inhbab</i>         | exons 1 and 2     | 80     | CAGCCCTTCGAGATCATCA         | CTGCCCTCTTGGAAATGT          |
| Non target genes      |                   |        |                             |                             |
| <i>actl6a</i>         | exons 4 and 5     | 103    | TCAGAGGCCCTCGTGGAAC         | GCACAGCTGATTACACAAGAA       |
| <i>ctsla</i>          | exons 6 and 7     | 113    | TGAGAAGGAGTGCAGCAGTG        | TCCAGCTGTTTTGACAATCC        |
| <i>mmp13b</i>         | exons 2 and 3     | 100    | CAAACGTGACCTTCAGGATTC       | GTCACCTTTCACAGCAGTTC        |
| Internal control gene |                   |        |                             |                             |
| <i>actb2</i>          | exons 3 and 4     | 74     | CAACAGGAAAAAGATGACACAGAT    | CAGCCTGGATGGCAACGT          |

**Table S4** Primer sequences used in this study. **a** Primers used for ZEDtw vector generation. **b** Primers used for enhancer element cloning. **c** Primers used for qRT-PCR.
